# Supplementary material
Source: PubMed Central journal article supplement (PMC3631326)
Supplement: supp_mct038_mct038supp.pdf [file supp_mct038_mct038supp.pdf]

## SUPPLEMENTARY DATA

FIG. S1. Natural variation for hypocotyl length in WL (A) and EOD (B) for 108 accessions of *Arabidopsis thaliana*. The linear correlation equation and the Pearson correlation index ( $r$ ) with  $P$ -value are shown in the graphs.

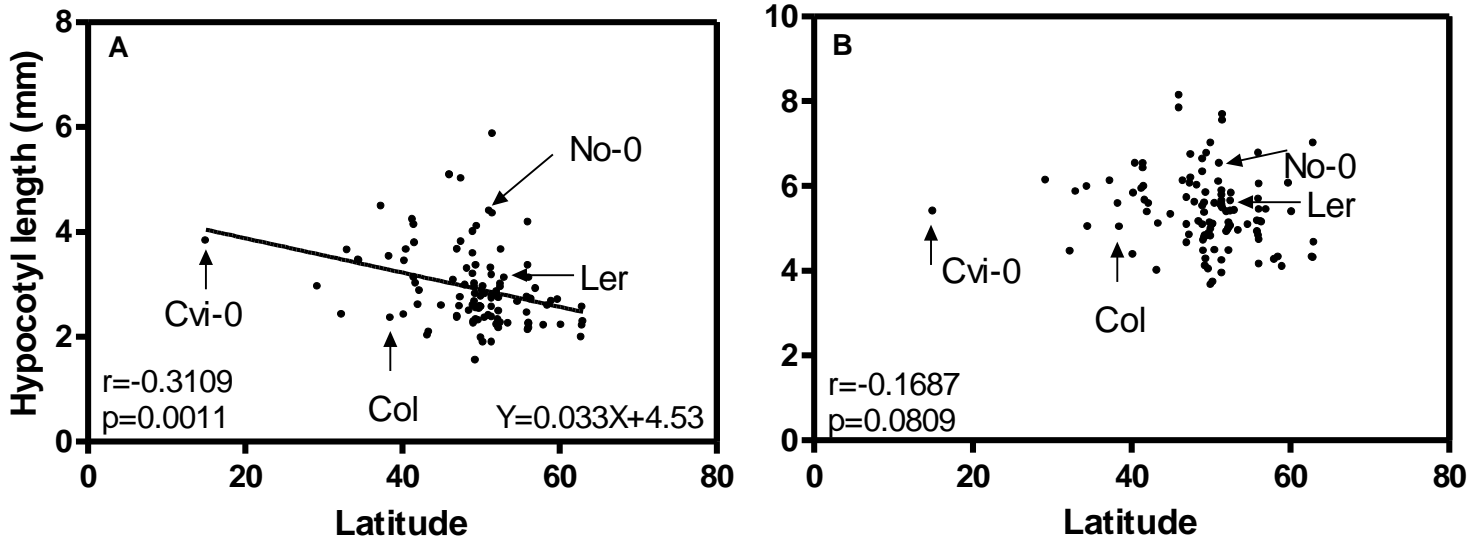

FIG. S2. Shade-avoidance response for hypocotyl growth in WT, *phyA* and *phyB*. Seedlings were grown in WL or EOD for 4 d in short-day conditions (A) and the EOD response was calculated (B). Each bar represents mean  $\pm$  s.e.m. Significant differences between means were determined using Student's *t*-test: \* $P < 0.05$ ; \*\*  $P < 0.001$ .

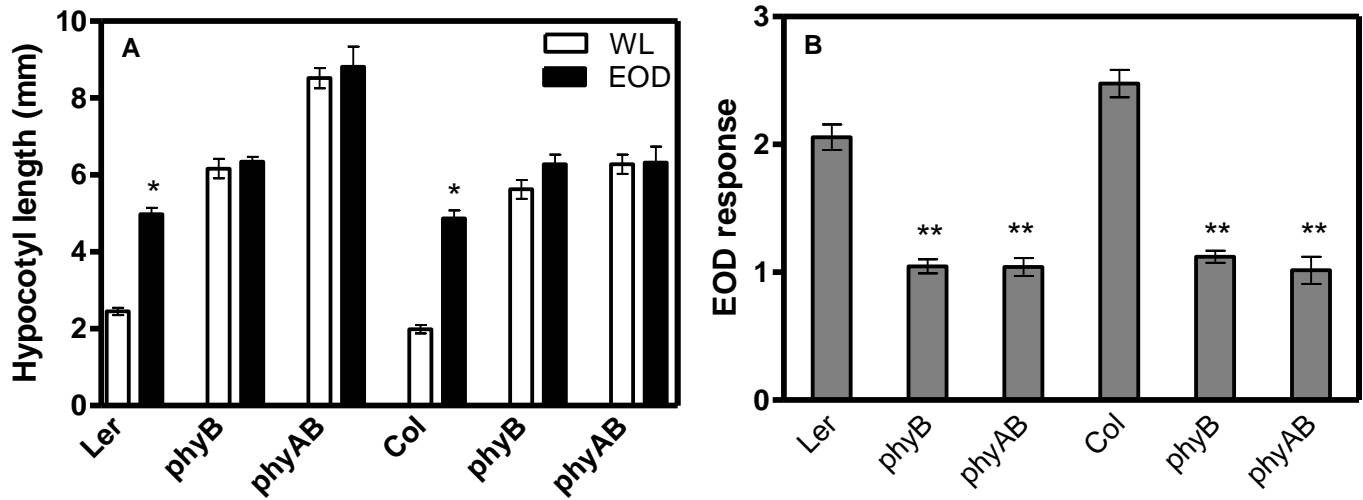

FIG. S3. Frequency distribution in WL, EOD and EOD response for Ler × Cvi-0 (A, B), Ler × Col (C, D) and Ler × No-0 (E, F) RIL populations. The average response of parental genotypes is indicated with arrows in each light condition.

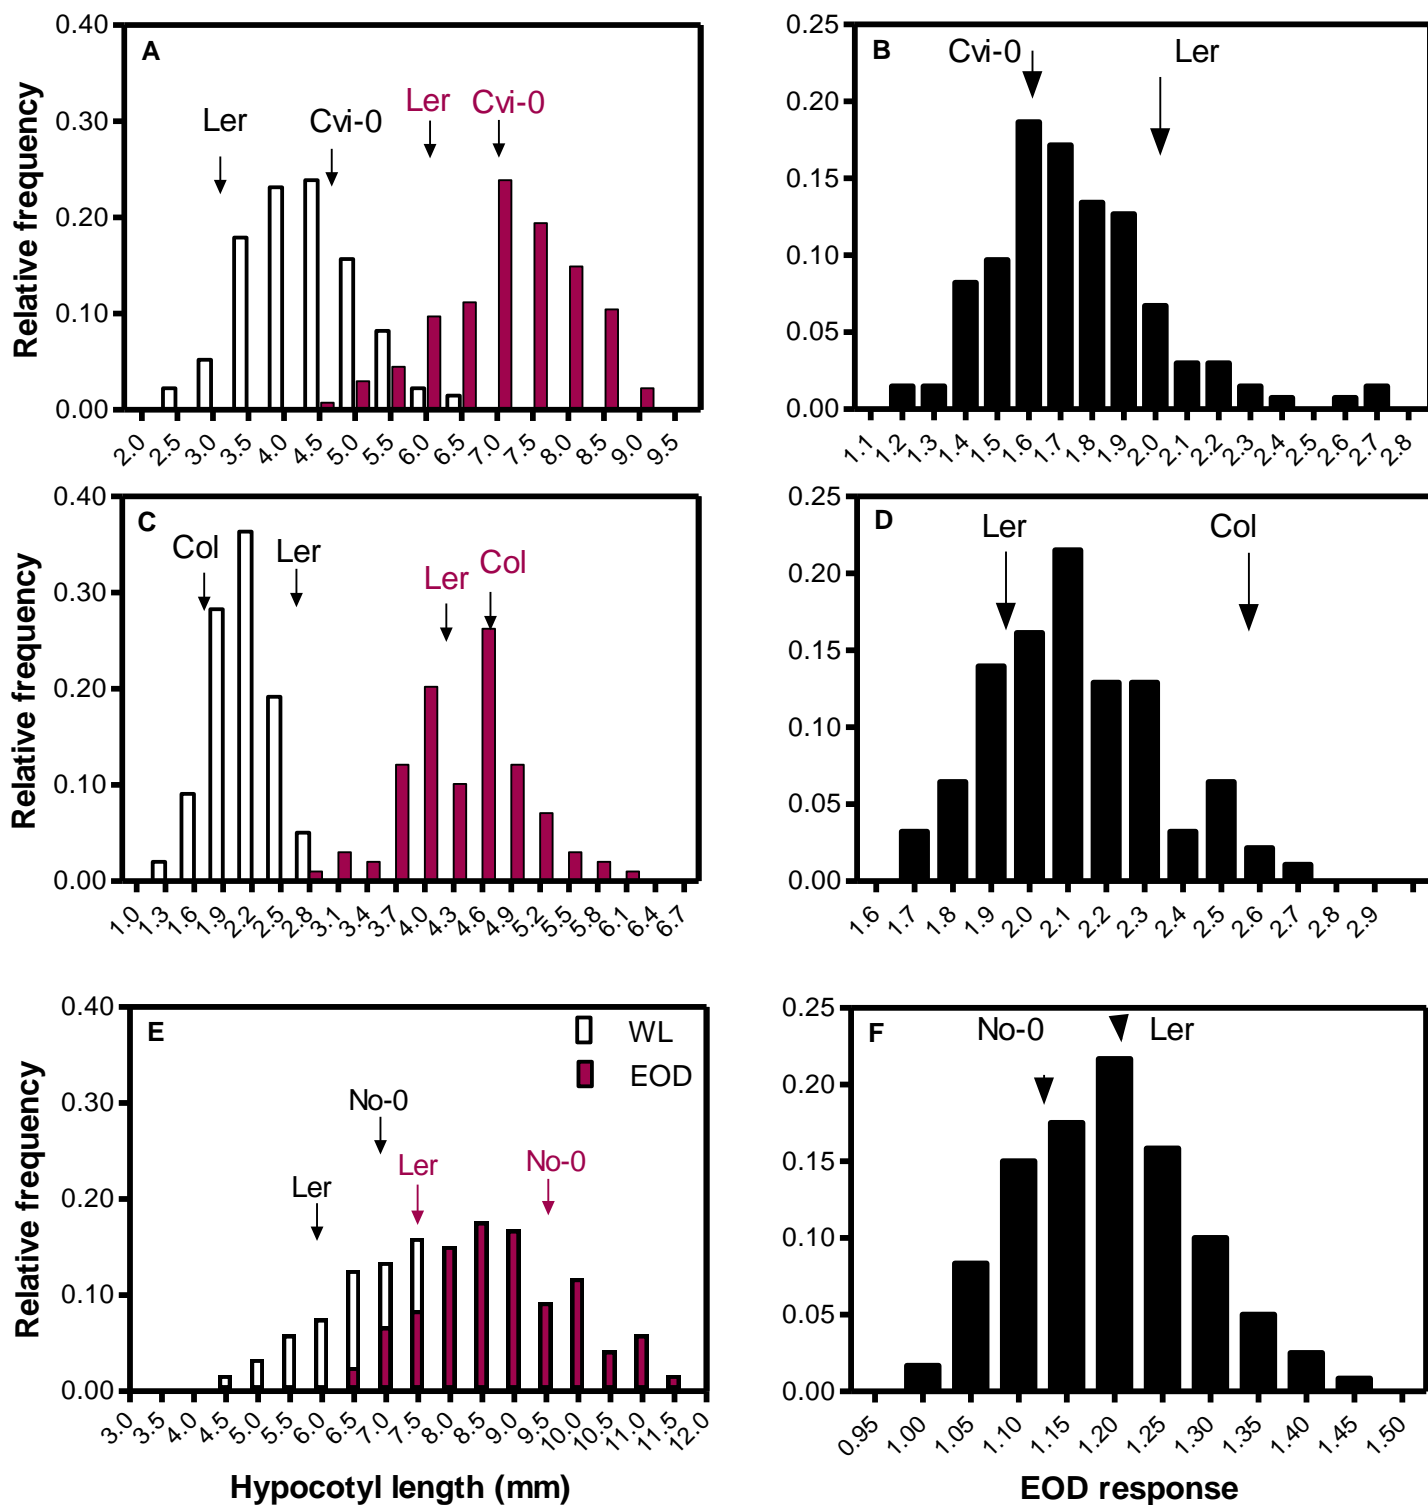

FIG. S4. *EODRATIO1* in WL (A) and EOD (B) is confirmed by HIF and rHIF polymorphics between CIW3 and NGA1126 markers at chromosome 2. Each bar represents mean  $\pm$  s.e.m. Significant differences between means of the same HIF or rHIF were determined using Student's *t*-test: \* $P < 0.05$ ; \*\* $P < 0.001$ .

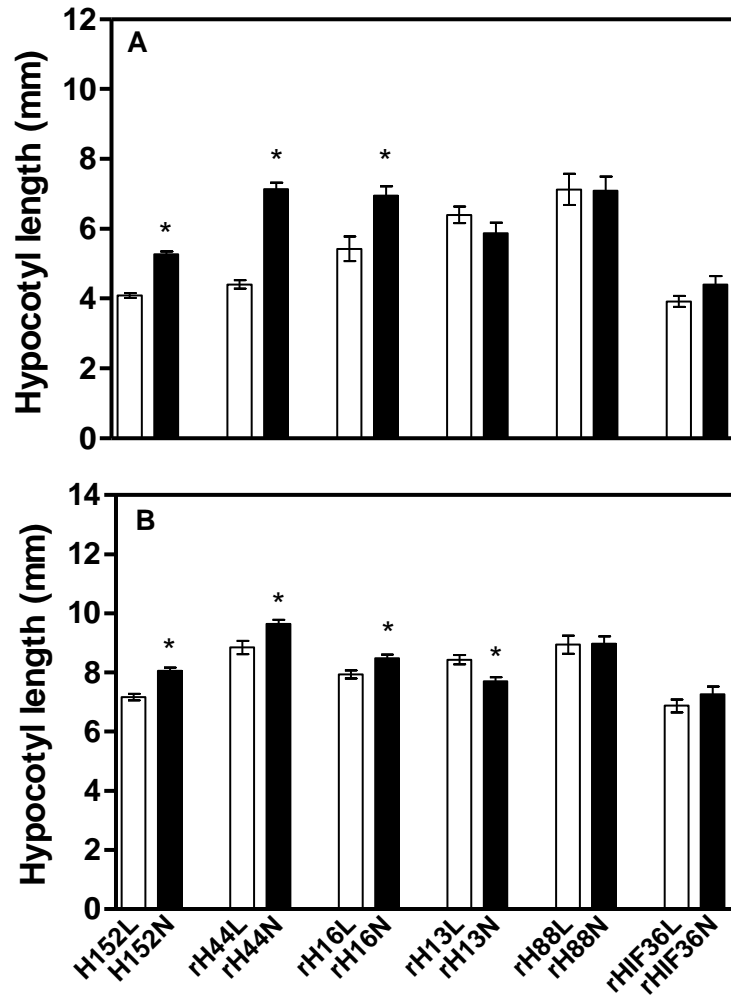

FIG. S5. *PHYB* gene is not responsible for *EODRATIO1* and *EODRATIO2*. In each graph the *P*-value of the interaction between tester genotype (genotype factor) and *phyB* mutation (*phyB* factor) is indicated. Quantitative complementation test with *phyB* mutant was done in Ler (A) and in Col (B) backgrounds.

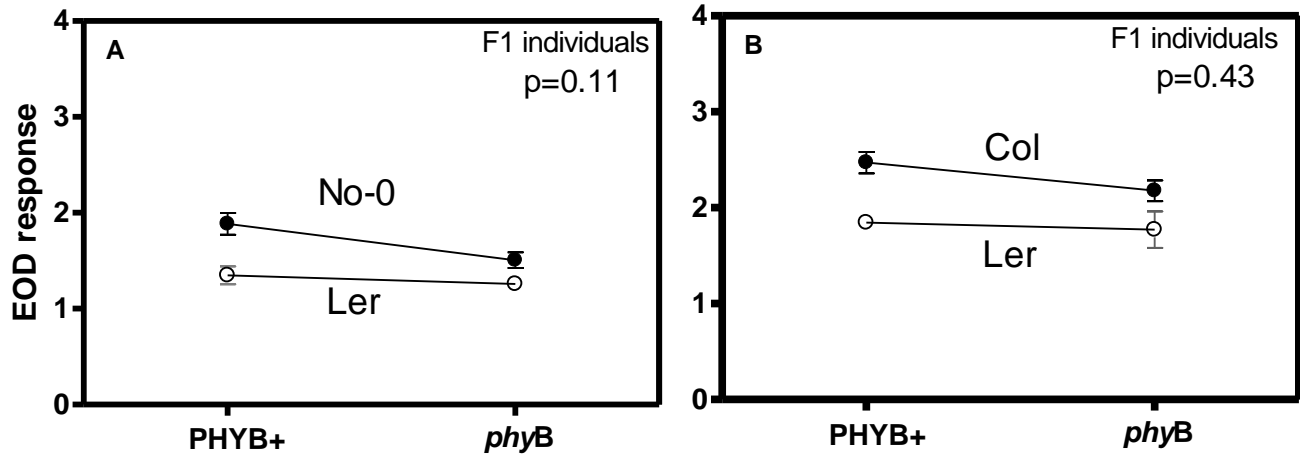

FIG. 6. *ERECTA* function in the shade-avoidance syndrome is pleiotropic. Leaf angle (A, E), petiole length (B, F), lamina length (C, G), and number of leaves at flowering (D, H) were measured in plants cultivated in WL and EOD. Each bar represents mean  $\pm$  s.e.m. Significant differences between means were determined using Student's *t*-test: \* $P < 0.05$ ; \*\* $P < 0.001$ . nd: not determined.

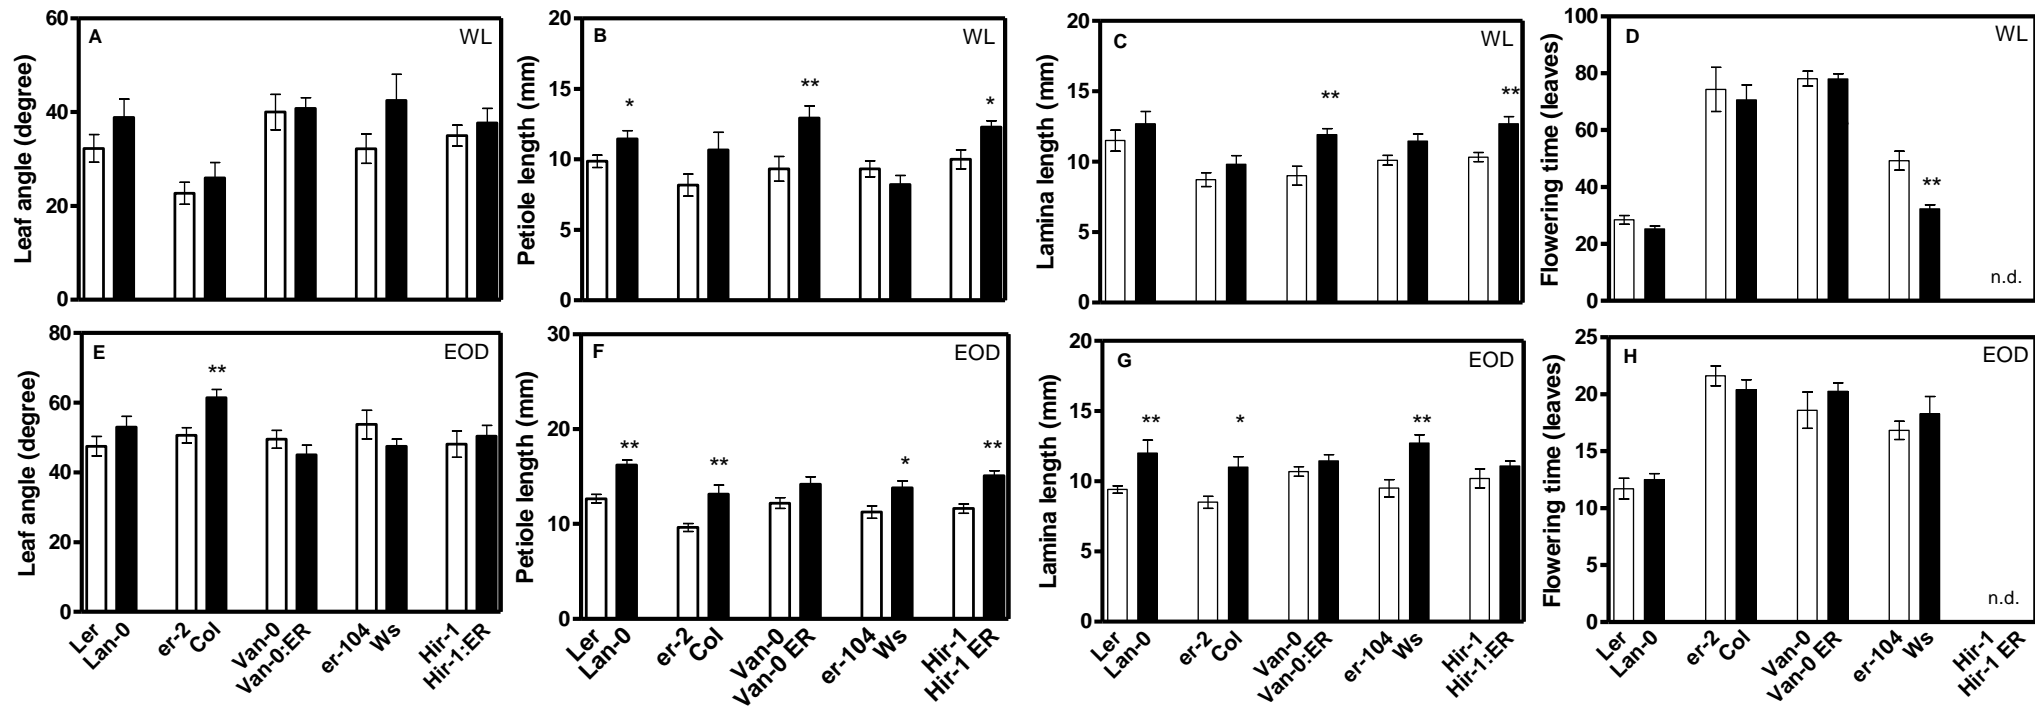

TABLE S1. Summary statistics for hypocotyl length under WL, EOD and EOD response. WL irradiation was  $30 \mu\text{mol m}^{-2} \text{s}^{-1}$  for the Ler  $\times$  No-0 experiment,  $70 \mu\text{mol m}^{-2} \text{s}^{-1}$  for the Ler  $\times$  Cvi-0 experiment, and  $110 \mu\text{mol m}^{-2} \text{s}^{-1}$  for the Ler  $\times$  Col experiment. Data are means (mm)  $\pm$  s.e.m.

|                           | WL              | EOD             | EOD response    |
|---------------------------|-----------------|-----------------|-----------------|
| <b><i>Ler x No-0</i></b>  |                 |                 |                 |
| Ler                       | $6.21 \pm 0.15$ | $7.53 \pm 0.18$ | $1.21 \pm 0.02$ |
| No-0                      | $8.67 \pm 0.31$ | $9.73 \pm 0.26$ | $1.13 \pm 0.05$ |
| RIL mean                  | $7.41 \pm 0.25$ | $8.78 \pm 0.25$ | $1.20 \pm 0.02$ |
| RIL max – min             | 10.93 – 4.47    | 11.80 – 6.28    | 1.71 – 1.00     |
| [Vg] <sup>1</sup>         | 2.011           | 1.675           | 0.019           |
| [Ve] <sup>2</sup>         | 0.312           | 0.262           | 0.007           |
| [H2] <sup>3</sup>         | 0.845           | 0.844           | 0.633           |
| [CVg] <sup>4</sup>        | 19.14           | 14.73           | 11.53           |
| <b><i>Ler x Col</i></b>   |                 |                 |                 |
| Ler                       | $2.05 \pm 0.15$ | $4.03 \pm 0.32$ | $1.89 \pm 0.10$ |
| Col                       | $1.77 \pm 0.10$ | $4.33 \pm 0.12$ | $2.47 \pm 0.19$ |
| RIL mean                  | $2.10 \pm 0.12$ | $4.40 \pm 0.05$ | $2.13 \pm 0.12$ |
| RIL max - min             | 3.10 – 1.28     | 5.98 – 2.88     | 2.68 – 1.52     |
| [Vg]                      | 0.180           | 0.633           | 0.161           |
| [Ve]                      | 0.057           | 0.212           | 0.111           |
| [H2]                      | 0.684           | 0.664           | 0.312           |
| [CVg]                     | 20.21           | 18.08           | 18.83           |
| <b><i>Ler x Cvi-0</i></b> |                 |                 |                 |
| Ler                       | $3.47 \pm 0.14$ | $6.94 \pm 0.42$ | $2.02 \pm 0.17$ |
| Cvi-0                     | $5.38 \pm 0.47$ | $8.26 \pm 0.10$ | $1.56 \pm 0.11$ |

|               |             |             |             |
|---------------|-------------|-------------|-------------|
| RIL mean      | 4.20 ± 0.22 | 7.13 ± 0.17 | 1.75 ± 0.11 |
| RIL max - min | 6.31 – 2.40 | 8.97 – 4.71 | 2.72 – 1.16 |
| [Vg]          | 1.110       | 1.500       | 0.240       |
| [Ve]          | 0.516       | 0.619       | 0.169       |
| [H2]          | 0.540       | 0.590       | 0.300       |
| [CVg]         | 25.14       | 17.20       | 27.94       |

---

<sup>1</sup> Vg is the among RIL line variance component for each trait.

<sup>2</sup> Ve is the residual (error) variance component.

<sup>3</sup> H2 is defined as broad sense heritability calculated as  $\sigma_G^2/\sigma_z^2$ . H2 is the proportion of the total phenotypic variance that is genetic ( $V_g/(V_g+V_e)$ ).

<sup>4</sup> Coefficient of genetic variation calculated as  $(100 \times \sqrt{V_g})/\text{media}$ .



Table S2. QTL mapping for hypocotyl length (mm) in WL and EOD and EOD response in three RIL populations sharing Ler as a common parental.

| QTL                       | Closest marker | Pos cM <sup>1</sup><br>(Accum. distance) | WL   |          |       |     | EOD   |          |       |    | EOD response |          |       |    |
|---------------------------|----------------|------------------------------------------|------|----------|-------|-----|-------|----------|-------|----|--------------|----------|-------|----|
|                           |                |                                          | LOD  | Interval | ADD   | %   | LOD   | Interval | ADD   | %  | LOD          | Interval | ADD   | %  |
| <b><i>Ler x No-0</i></b>  |                |                                          |      |          |       |     |       |          |       |    |              |          |       |    |
| <i>WL1</i>                | C4_CIW7        | 52 (304)                                 | 3.58 | 45-61    | 0.82  | 9   | 2.45  | 36-68    | 0.65  | 6  |              |          |       |    |
| <i>EOD1</i>               | C1_NGA111      | 99 (99)                                  | 2.93 | 88-102   | -0.9  | 11  | 2.99  | 87-100   | -0.77 | 10 |              |          |       |    |
| <i>EOD2</i>               | C2_NGA1126     | 43 (145)                                 |      |          |       |     | 12.48 | 37-47    | -1.5  | 37 |              |          |       |    |
| <i>EODRATIO1</i>          | C2_PSL5        | 31 (133)                                 | 9.38 | 26-40    | -1.49 | 33  |       |          |       |    | 3.58         | 2-35     | 0.096 | 17 |
| <b><i>Ler x Col</i></b>   |                |                                          |      |          |       |     |       |          |       |    |              |          |       |    |
| <i>WL2</i>                | C1_GAPB        | 61 (61)                                  | 3.55 | 35-65    | 0.26  | 14  |       |          |       |    |              |          |       |    |
| <i>WL3</i>                | C3_g4708       | 24 (213)                                 | 5.38 | 0-25     | -0.3  | 17  | 4.18  | 0-25     | -0.48 | 13 |              |          |       |    |
| <i>WL4</i>                | C4_PG11        | 75 (331)                                 | 2.65 | 40-102   | -0.21 | 9   |       |          |       |    |              |          |       |    |
| <i>WL5</i>                | C5_O6569       | 18 (369)                                 | 4.11 | 0-28     | 0.26  | 12  | 3.68  | 0-22     | 0.44  | 10 |              |          |       |    |
| <i>WL6</i>                | C5_m435        | 109 (460)                                | 2.95 | 82-109   | -0.26 | 13  |       |          |       |    |              |          |       |    |
| <i>EOD3</i>               | C1_m315        | 97 (97)                                  |      |          |       |     | 2.55  | 77-107   | 0.41  | 9  |              |          |       |    |
| <i>EOD4</i>               | C2_g6842       | 47(168)                                  |      |          |       |     | 6.92  | 44-51    | 0.75  | 20 |              |          |       |    |
| <i>EODRATIO2</i>          | C2_m216        | 34 (156)                                 |      |          |       |     |       |          |       |    | 4.35         | 25-46    | 0.18  | 15 |
| <i>EODRATIO3</i>          | C5_m247        | 74 (426)                                 |      |          |       |     |       |          |       |    | 5.5          | 60-84    | 0.27  | 33 |
| <b><i>Ler x Cvi-0</i></b> |                |                                          |      |          |       |     |       |          |       |    |              |          |       |    |
| <i>WL7</i>                | C5_DF119L      | 110 (470)                                | 3.00 | 105-112  | -0.45 | 7.5 | 2.4   | 90-112   | -0.45 | 6  |              |          |       |    |
| <i>EOD5</i>               | C1_GH157L      | 104 (104)                                |      |          |       |     | 2.5   | 102-105  | 0.16  | 6  |              |          |       |    |
| <i>EOD6</i>               | C2_ERECTA      | 47 (172)                                 | 2.67 | 39-49    | -0.41 | 6.4 | 3.67  | 39-49    | -0.91 | 11 |              |          |       |    |
| <i>EODRATIO4</i>          | C1_EC.66C      | 28 (28)                                  |      |          |       |     |       |          |       |    | 4.62         | 14-30    | 0.068 | 14 |
| <i>EODRATIO5</i>          | C2_FD81L       | 15 (140)                                 |      |          |       |     |       |          |       |    | 2.41         | 6-19     | 0.07  | 7  |

1. Accumulative distance of the five chromosomes of Arabidopsis is indicated between parentheses.
